# Supplementary material for: Variability in the validity and reliability of outcome measures identified in a systematic review to assess treatment efficacy of cognitive enhancers for Alzheimer’s Dementia
Source: PubMed Central journal article supplement (PMC6472754; doi:10.1371/journal.pone.0215225), 2019-04-18
Supplement: pone.0215225.s001.pdf [file pone.0215225.s001.pdf]

**S1 Table. Validity and Reliability Definitions**

|             |               | Type                    | Definition                                                                                                                                                            |
|-------------|---------------|-------------------------|-----------------------------------------------------------------------------------------------------------------------------------------------------------------------|
| Construct   | Translational | Face/Content            | Based on the consensus or judgement of experts, the instrument or scale appears to measure or capture the complete range of attributes of the construct of interest.  |
|             | Criterion     | Concurrent              | The extent to which scores on a scale correlate with some other scale that measures the same construct and are tested at the same time.                               |
|             |               | Predictive              | The extent to which scores on a scale correlate with some other scale that measures the same construct and the results of which are not known until some future time. |
|             |               | Convergent              | The extent to which different scales measuring the same construct are related.                                                                                        |
|             |               | Discriminant            | The extent to which different scales measuring different constructs are related                                                                                       |
| Reliability |               | Internal consistency    | Extent to which performance on one item on a scale is a good indicator for performance on another item in the scale                                                   |
|             |               | Test-retest             | The extent to which the scoring or performance on an instrument or scale is stable over time.                                                                         |
|             |               | Inter-rater reliability | The degree of agreement between administrators.                                                                                                                       |

**Source:** Trochim W (2001). The Research Methods Knowledge Base (2<sup>nd</sup> Ed.). Cincinnati, OH. Atomic Dog Publishing
