# Supplementary material for: Variability in the validity and reliability of outcome measures identified in a systematic review to assess treatment efficacy of cognitive enhancers for Alzheimer’s Dementia
Source: PubMed Central journal article supplement (PMC6472754; doi:10.1371/journal.pone.0215225), 2019-04-18
Supplement: pone.0215225.s002.pdf [file pone.0215225.s002.pdf]

**S2 Table. Frequency of Cognitive Outcome Measures (n=57)**

| <b>Name</b>                                                                                                                                                       | <b>Total</b> |
|-------------------------------------------------------------------------------------------------------------------------------------------------------------------|--------------|
| Mini Mental State Exam (MMSE)                                                                                                                                     | 80           |
| Alzheimer's Disease Assessment Scale- Cognitive subscale (ADAS-Cog)                                                                                               | 61           |
| Severe Impairment Battery (SIB)                                                                                                                                   | 13           |
| Global Deterioration Scale (GDS)                                                                                                                                  | 10           |
| Clinical Dementia Rating Scale (CDR)                                                                                                                              | 7            |
| Clinical Dementia Rating Scale – Sum of Boxes (CDR-SB)                                                                                                            | 7            |
| Trail Making Test (TMT)                                                                                                                                           | 5            |
| Clock Drawing Test (CDT)                                                                                                                                          | 4            |
| Digit Span Test (DS)                                                                                                                                              | 4            |
| Digit Symbols Test (DST)                                                                                                                                          | 4            |
| Raven Colored Matrices (RCM)                                                                                                                                      | 3            |
| Stroop Test (ST)                                                                                                                                                  | 3            |
| Stockholm Gerontology Research Center test (SGRC)                                                                                                                 | 3            |
| Verbal Fluency (VF)                                                                                                                                               | 3            |
| Blessed Dementia Scale (BDS)                                                                                                                                      | 2            |
| Clock Recognition (C-Recog)                                                                                                                                       | 2            |
| Rey Auditory Verbal Learning Test (RAVLT)                                                                                                                         | 2            |
| Rey-Osterrieth Complex Figure Copy (ROCF- copy)                                                                                                                   | 2            |
| Story Recall (SR)                                                                                                                                                 | 2            |
| Trail Making Test A (TMT-A)                                                                                                                                       | 2            |
| Stockholm Gerontology Research Center test- D-prime value (SGRC D-prime)                                                                                          | 2            |
| Word Paradigm- free recall (WP-FR)                                                                                                                                | 2            |
| Alzheimer's Disease Assessment Scale (ADAS)                                                                                                                       | 1            |
| Alzheimer's Disease Assessment Scale - Orientation Test (ADAS-OT)                                                                                                 | 1            |
| American Speech-Language Hearing Association- Functional Assessment of Communication Skills for Adults Basic needs and social communication subscales (ASHA-FACS) | 1            |
| Cambridge Cognitive Examination (CAMCOG)                                                                                                                          | 1            |
| Cambridge Automated Neuropsychiatric Test Assessment Battery (CANTAB)                                                                                             | 1            |
| Cognitive Drug Research Test Battery (CDRTB)                                                                                                                      | 1            |
| Consortium to Establish a Registry for Alzheimer's Disease –cog subscale (CERAD-cog)                                                                              | 1            |
| Category Fluency Test (CFT)                                                                                                                                       | 1            |
| Computerized Memory Battery Test (CMBT)                                                                                                                           | 1            |
| Controlled Oral Word Association Test (COWAT)                                                                                                                     | 1            |
| Delayed Word Recall (DWR)                                                                                                                                         | 1            |

|                                                               |   |
|---------------------------------------------------------------|---|
| Forced Delayed Recognition (FDR)                              | 1 |
| Frontal Assessment Battery (FAB)                              | 1 |
| Functional Linguistic Communication Inventory (FLCI)          | 1 |
| Groton Maze Learning Task (GMLT)                              | 1 |
| Immediate Visual Memory (IVM)                                 | 1 |
| Multiple Feature Target Cancellation (MFTC)                   | 1 |
| Non-Demanding Test of Visual Attention (NDTVA)                | 1 |
| NYU stories test delayed recognition subscale (NYU-ST-DRecog) | 1 |
| Oral Production Test                                          | 1 |
| Reading and Setting a Clock Test (RSCT)                       | 1 |
| Rey-Osterrieth complex figure recall (ROCF-recall)            | 1 |
| Syndrom Kurz test (SKT)                                       | 1 |
| Serial Reaction Time Task (SRTT)                              | 1 |
| Spatial Span (SS)                                             | 1 |
| Test of Constructional Praxis (TCP)                           | 1 |
| Temporal Rule Induction (TRI)                                 | 1 |
| Token Test (TT)                                               | 1 |
| Visual Motor Gestalt Test (Bender) (VMGT)                     | 1 |
| Wechsler Adult Intelligence Scale (WAIS)                      | 1 |
| Word Fluency (WF)                                             | 1 |
| Word Learning (WL)                                            | 1 |
| Wechsler Logical Memory Test (WLMT)                           | 1 |
| Wechsler Memory Scale (WMS)                                   | 1 |
| Zahlen-Verbindungs Test (ZVT)                                 | 1 |
