# Supplementary material for: Variability in the validity and reliability of outcome measures identified in a systematic review to assess treatment efficacy of cognitive enhancers for Alzheimer’s Dementia
Source: PubMed Central journal article supplement (PMC6472754; doi:10.1371/journal.pone.0215225), 2019-04-18
Supplement: pone.0215225.s003.pdf [file pone.0215225.s003.pdf]

**S3 Table. Frequency of Functional Outcome Measures (n=21)**

| <b>Measure</b>                                                                                                  | <b>Total</b> |
|-----------------------------------------------------------------------------------------------------------------|--------------|
| Physical Self-Maintenance/Activities of Daily Living (ADL)                                                      | 19           |
| Alzheimer's Disease Cooperative Studies–Activities of Daily Living Inventory (ADCS-ADL)                         | 14           |
| Disability Assessment for Dementia (DAD)                                                                        | 14           |
| Instrumental Activities of Daily Living (IADL)                                                                  | 10           |
| Progressive Deterioration Scale (PDS)                                                                           | 8            |
| Alzheimer's Disease Cooperative Studies Activities of Daily Living Severe impairment subscale (ADCS-ADL-severe) | 6            |
| Functional Assessment Screening Tool (FAST)                                                                     | 6            |
| Barthel Index (BI)                                                                                              | 2            |
| Caregiver-rated Modified Crichton Scale (CMCS)                                                                  | 2            |
| Mental Function Impairment Scale (MENFIS)                                                                       | 2            |
| Nurses Observation Scale for Geriatric Patients (NOSGER)                                                        | 2            |
| Activity & Affect Indicators of Quality of Life (AAIQOL)                                                        | 1            |
| Alzheimer's Disease Functional Assessment and Change Scale (ADFACS)                                             | 1            |
| Bristol Activities of Daily Living (BADL)                                                                       | 1            |
| Caregiver Burden Questionnaire (CBQ)                                                                            | 1            |
| Caregiver Perceived Burden Questionnaire (CPBQ)                                                                 | 1            |
| Functional Rating Scale (FRS)                                                                                   | 1            |
| Global Assessment of Functioning Scale (GAFS)                                                                   | 1            |
| Goal Attainment Scale (GAS)                                                                                     | 1            |
| Interview for Deterioration in Daily Living Activities in Dementia (IDDD)                                       | 1            |
| Zarit Burden Interview (ZBI)                                                                                    | 1            |
