# Supplementary material for: Variability in the validity and reliability of outcome measures identified in a systematic review to assess treatment efficacy of cognitive enhancers for Alzheimer’s Dementia
Source: PubMed Central journal article supplement (PMC6472754; doi:10.1371/journal.pone.0215225), 2019-04-18
Supplement: pone.0215225.s004.pdf [file pone.0215225.s004.pdf]

**S4 Table. Frequency of Behavioural Outcome Measures (n=13)**

| <b>Measure</b>                                                        | <b>Total</b> |
|-----------------------------------------------------------------------|--------------|
| Neuropsychiatric Inventory (NPI)                                      | 36           |
| Behavioural Pathology in Alzheimer's Disease Rating Scale (BEHAVE-AD) | 5            |
| Cohen-Mansfield Agitation Inventory (CMAI)                            | 5            |
| Neuropsychiatric Inventory – Caregiver distress scale (NPI-CDS)       | 4            |
| Behavioural Rating Scale for Geriatric Patients (BRS)                 | 3            |
| Apathy Scale (AS)                                                     | 1            |
| Brief Neuropsychiatric Inventory Scale (b-NPI)                        | 1            |
| Brief Psychiatric Rating Scale (b-PRS)                                | 1            |
| Caregiver-Administered-Neuropsychiatric Inventory (CA-NPI)            | 1            |
| Crichton Geriatric Rating Scale (CGRS)                                | 1            |
| Geriatric Depression Scale (GDS)                                      | 1            |
| Neuropsychiatric Inventory –Nursing Home version (NPI-NH)             | 1            |
| Pittsburgh Agitation Scale (PAS)                                      | 1            |
