# Supplementary material for: Variability in the validity and reliability of outcome measures identified in a systematic review to assess treatment efficacy of cognitive enhancers for Alzheimer’s Dementia
Source: PubMed Central journal article supplement (PMC6472754; doi:10.1371/journal.pone.0215225), 2019-04-18
Supplement: pone.0215225.s006.pdf [file pone.0215225.s006.pdf]

**S6 Table. Missing References and Sources of Funding**

| <b>Measure</b>                                        | <b>Funding</b>                                                                                                                                                |
|-------------------------------------------------------|---------------------------------------------------------------------------------------------------------------------------------------------------------------|
| Patient Global Assessment (PGA)[1]                    | Industry sponsored                                                                                                                                            |
| Mental Function Impairment Scale (MENFIS)[2, 3]       | Industry sponsored                                                                                                                                            |
| Caregiver burden questionnaire[4]                     | Industry sponsored                                                                                                                                            |
| Digit Span[5-8]                                       | Non-industry sponsored; Mixed funding (industry and non-industry sponsored); not reported, industry sponsored; industry sponsored                             |
| Digit Symbols test[9-11]                              | Non-industry sponsored; non-industry sponsored; Mixed funding (industry and non-industry sponsored)                                                           |
| Stockholm Gerontology Research Center Test[9, 10, 12] | Mixed funding (industry and non-industry sponsored); Mixed funding (industry and non-industry sponsored); Mixed funding (industry and non-industry sponsored) |
| Stockholm D-prime[9, 11]                              | Mixed funding (industry and non-industry sponsored); Mixed funding (industry and non-industry sponsored)                                                      |
| Stroop Test[13] [7, 14]                               | Not reported; not reported, not reported; industry sponsored                                                                                                  |
| Clock recognition[10, 12]                             | Mixed funding (industry and non-industry sponsored); Mixed funding (industry and non-industry sponsored)                                                      |
| Verbal Fluency[5, 6]                                  | Non-industry sponsored; Mixed funding (industry and non-industry sponsored)                                                                                   |
| CANTAB[15]                                            | Mixed funding (industry and non-industry sponsored)                                                                                                           |
| Category Fluency Test[14]                             | Industry sponsored                                                                                                                                            |
| Cognitive Drug research test battery[16]              | Industry sponsored                                                                                                                                            |
| Computerized memory battery test [1]                  | Industry sponsored                                                                                                                                            |
| Forced delayed recognition[5]                         | Non-industry sponsored                                                                                                                                        |
| Immediate visual memory[5]                            | Non-industry sponsored                                                                                                                                        |
| Multiple feature cancellation test[5]                 | Non-industry sponsored                                                                                                                                        |
| Non-demanding test of visual attention[5]             | Non-industry sponsored                                                                                                                                        |

|                                                    |                                                     |
|----------------------------------------------------|-----------------------------------------------------|
| NYU stories test delayed recognition subscale [17] | Non-industry sponsored                              |
| Reading and setting a clock[11]                    | Mixed funding (industry and non-industry sponsored) |
| Serial reaction test[18]                           | Mixed funding (industry and non-industry sponsored) |
| Spatial span[6]                                    | Mixed funding (industry and non-industry sponsored) |
| Temporal rule induction[5]                         | Non-industry sponsored                              |
| Test of constructional praxis[5]                   | Non-industry sponsored                              |
| Token Test[6]                                      | Mixed funding (industry and non-industry sponsored) |
| Visual motor gestalt[19]                           | Not reported                                        |
| WAIS (performance and verbal IQ)[20]               | Not reported                                        |
| Verbal fluency [17]                                | Non-industry sponsored                              |
| Word Learning [7]                                  | Not reported                                        |

## References

- [1] Seltzer B, Zolnouni P, Nunez M, Goldman R, Kumar D, Ieni J, et al. Efficacy of donepezil in early-stage Alzheimer disease: a randomized placebo-controlled trial. *Arch Neurol*. 2004;61:1852-6.
- [2] Homma A. NR, Ishii T., Hasegawa K. Development of a new rating scale for dementia in the elderly: Mental function impairment scale (MENFIS). *Japanese Journal of Geriatric Psychiatry*. 1991;2:1217-22.
- [3] Homma A, Takeda M, Imai Y, Udaka F, Hasegawa K, Kameyama M, et al. Clinical efficacy and safety of donepezil on cognitive and global function in patients with Alzheimer's disease. A

24-week, multicenter, double-blind, placebo-controlled study in Japan. E2020 Study Group. *Dement Geriatr Cogn Disord.* 2000;11:299-313.

[4] Black SE, Doody R, Li H, McRae T, Jambor KM, Xu Y, et al. Donepezil preserves cognition and global function in patients with severe Alzheimer disease. *Neurology.* 2007;69:459-69.

[5] Bizzarro A, Marra C, Acciarri A, Valenza A, Tiziano FD, Brahe C, et al. Apolipoprotein E epsilon4 allele differentiates the clinical response to donepezil in Alzheimer's disease. *Dement Geriatr Cogn Disord.* 2005;20:254-61.

[6] Lorenzi M, Beltramello A, Mercuri NB, Canu E, Zoccatelli G, Pizzini FB, et al. Effect of memantine on resting state default mode network activity in Alzheimer's disease. *Drugs Aging.* 2011;28:205-17.

[7] Nakano S, Asada T, Matsuda H, Uno M, Takasaki M. Donepezil hydrochloride preserves regional cerebral blood flow in patients with Alzheimer's disease. *J Nucl Med.* 2001;42:1441-5.

[8] Forette F, Anand R, Gharabawi G. A phase II study in patients with Alzheimer's disease to assess the preliminary efficacy and maximum tolerated dose of rivastigmine (Exelon). *Eur J Neurol.* 1999;6:423-9.

[9] Darreh-Shori T, Kadir A, Almkvist O, Grut M, Wall A, Blomquist G, et al. Inhibition of acetylcholinesterase in CSF versus brain assessed by <sup>11</sup>C-PMP PET in AD patients treated with galantamine. *Neurobiol Aging.* 2008;29:168-84.

[10] Kadir A, Darreh-Shori T, Almkvist O, Wall A, Grut M, Strandberg B, et al. PET imaging of the in vivo brain acetylcholinesterase activity and nicotine binding in galantamine-treated patients with AD. *Neurobiol Aging.* 2008;29:1204-17.

- [11] Stefanova E, Wall A, Almkvist O, Nilsson A, Forsberg A, Langstrom B, et al. Longitudinal PET evaluation of cerebral glucose metabolism in rivastigmine treated patients with mild Alzheimer's disease. *J Neural Transm (Vienna)*. 2006;113:205-18.
- [12] Keller C, Kadir A, Forsberg A, Porras O, Nordberg A. Long-term effects of galantamine treatment on brain functional activities as measured by PET in Alzheimer's disease patients. *J Alzheimers Dis*. 2011;24:109-23.
- [13] Borkowska A, Ziolkowska-Kochan M, Rybakowski JK. One-year treatment of Alzheimer's disease with acetylcholinesterase inhibitors: improvement on ADAS-cog and TMT A, no change or worsening on other tests. *Hum Psychopharmacol*. 2005;20:409-14.
- [14] Wilkinson D, Fox NC, Barkhof F, Phul R, Lemming O, Scheltens P. Memantine and brain atrophy in Alzheimer's disease: a 1-year randomized controlled trial. *J Alzheimers Dis*. 2012;29:459-69.
- [15] Nordberg A, Darreh-Shori T, Peskind E, Soininen H, Mousavi M, Eagle G, et al. Different cholinesterase inhibitor effects on CSF cholinesterases in Alzheimer patients. *Curr Alzheimer Res*. 2009;6:4-14.
- [16] Frolich L, Ashwood T, Nilsson J, Eckerwall G, Sirocco I. Effects of AZD3480 on cognition in patients with mild-to-moderate Alzheimer's disease: a phase IIb dose-finding study. *J Alzheimers Dis*. 2011;24:363-74.
- [17] Greenberg SM, Tennis MK, Brown LB, Gomez-Isla T, Hayden DL, Schoenfeld DA, et al. Donepezil therapy in clinical practice: a randomized crossover study. *Arch Neurol*. 2000;57:94-9.

- [18] Winstein CJ, Bentzen KR, Boyd L, Schneider LS. Does the cholinesterase inhibitor, donepezil, benefit both declarative and non-declarative processes in mild to moderate Alzheimer's disease? *Curr Alzheimer Res.* 2007;4:273-6.
- [19] Abolfazli R, Ghazanshahi, S., Nzaeman, M. Effects of 6 months of treatment with Donepezil, and Rivastigmine on results of neuropsychological tests of MMSE, NPI, Clock and Bender in patients with Alzheimer's Disease. *Acta Medica Iranica.* 2008;46:99-104.
- [20] Thomas A, Iacono D, Bonanni L, D'Andreamatteo G, Onofrj M. Donepezil, rivastigmine, and vitamin E in Alzheimer disease: a combined P300 event-related potentials/neuropsychologic evaluation over 6 months. *Clin Neuropharmacol.* 2001;24:31-42.
