# Supplementary material for: Variability in the validity and reliability of outcome measures identified in a systematic review to assess treatment efficacy of cognitive enhancers for Alzheimer’s Dementia
Source: PLoS One. 2019 Apr 18;14(4):e0215225. doi: 10.1371/journal.pone.0215225 (PMC6472754; doi:10.1371/journal.pone.0215225)
Supplement: S5 Table — (PDF) [file pone.0215225.s005.pdf]

**S5 Table. Frequency of Global Status Outcome Measures (n=10)**

| <b>Measure</b>                                                                               | <b>Total</b> |
|----------------------------------------------------------------------------------------------|--------------|
| Clinician Interview-Based Impression of Change plus caregiver input (CIBIC-plus)             | 35           |
| Clinical Global Impression of Change (CGIC)                                                  | 10           |
| Clinical Global Impression of Improvement (CGI-I)                                            | 3            |
| Alzheimer's Disease Cooperative Studies – Clinician Global Impressions of Change (ADCS-CGIC) | 2            |
| Caregiver Stress Scale (CSS)                                                                 | 2            |
| Gottfries-Bråne-Steen Scale (GBS)                                                            | 2            |
| Caregiver-rated Global Impression (CRGI)                                                     | 1            |
| Clinical Global Impression of Change - severe subscale (CGIC-severe)                         | 1            |
| Patient Global Assessment Scale (PGA)                                                        | 1            |
| Screen for Caregiver Burden (SCB)                                                            | 1            |
